# Supplementary material
Source: PubMed Central journal article supplement (PMC5788817)

# Assessment of time to access PC vs. mRay

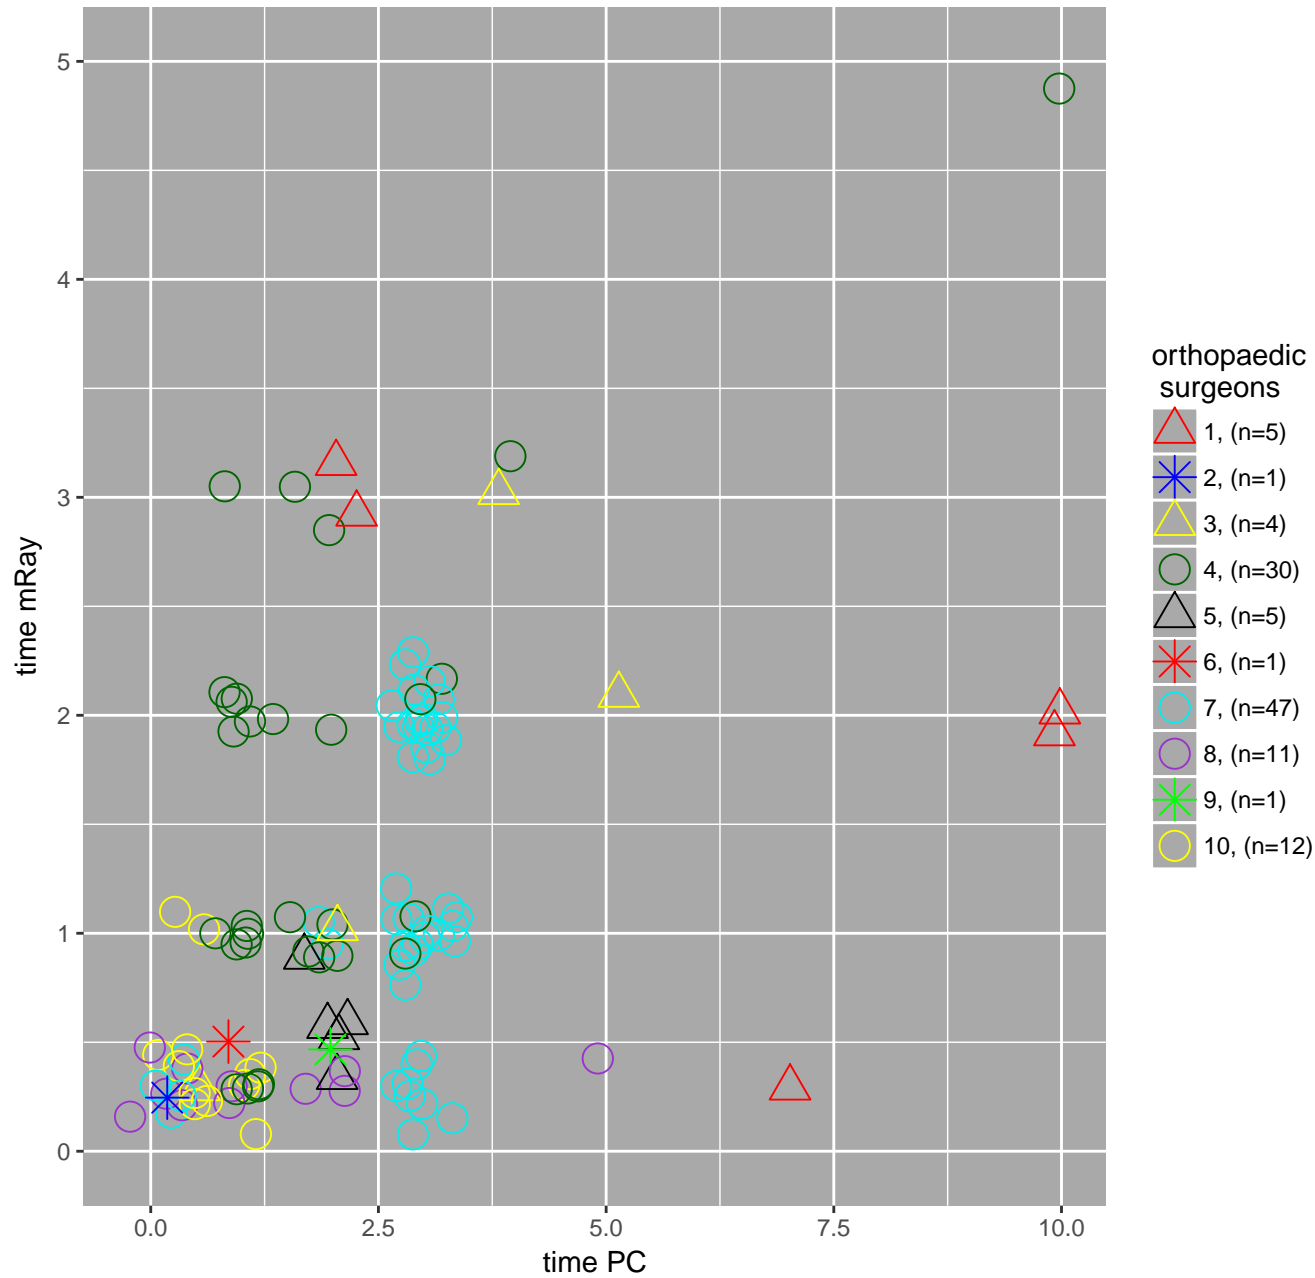

Supplement: 10278_2017_11_MOESM1_ESM.pdf [file 10278_2017_11_MOESM1_ESM.pdf]
